# Supplementary material for: Selective Internal Radiotherapy (SIRT) and Chemosaturation Percutaneous Hepatic Perfusion (CS-PHP) for Metastasized Uveal Melanoma: A Retrospective Comparative Study
Source: MDPI journal article supplement (doi:10.3390/cancers15204942), 2023-10-11
Supplement: s1 [file s1]

## Supplementary Materials

**Table S1.** Overall survival of the study population from the timepoint of study treatment in three different approaches to available data.

| OS in Days     | Estimation  | SIRT           | CS-PHP              |
|----------------|-------------|----------------|---------------------|
| from treatment | restrictive | mean $\pm$ SD  | 349.74 $\pm$ 289.33 |
|                |             | median (range) | 250 (19–1254)       |
|                | moderate    | mean $\pm$ SD  | 409.94 $\pm$ 406.96 |
|                |             | median (range) | 300.5 (19–1912)     |
|                | optimistic  | mean $\pm$ SD  | 581.79 $\pm$ 530.73 |
|                |             | median (range) | 527 (19–2164)       |

**Table S2.** Progression-free survival from the timepoint of study treatment in three different approaches to available data.

| PFS in Days    | Estimation  | SIRT           | CS-PHP              |
|----------------|-------------|----------------|---------------------|
| from treatment | restrictive | mean $\pm$ SD  | 349.74 $\pm$ 289.32 |
|                |             | median (range) | 250 (19–1254)       |
|                | moderate    | mean $\pm$ SD  | 303.88 $\pm$ 392.28 |
|                |             | median (range) | 127.5 (19–1912)     |
|                | optimistic  | mean $\pm$ SD  | 475.74 $\pm$ 554.53 |
|                |             | median (range) | 222.5 (19–2164)     |

**Table S3.** Overall survival and progression-free survival from the timepoint of study treatment in months in the literature.

| Study             | SIRT OS | SIRT PFS | CS-PHP OS | CS-PHP PFS |
|-------------------|---------|----------|-----------|------------|
| This study        | 9.90    | 4.16     | 16.96     | 13.43      |
| Abbott A.M. [35]  | 9.69    | 1.8      |           |            |
| Alexander H. [20] | 12.3    |          |           |            |
| Meijer T. [25]    |         |          | 19.1      | 7.6        |
| Dewald C. [24]    |         |          | 18.4      | 8.4        |
| Hughes M. [23]    |         |          | 10.6      | 5.4        |
| Modi S. [36]      |         |          | 14.9      | 8.4        |
| Brüning R. [37]   |         |          | 16.7      |            |
| Karydis I. [38]   |         |          | 15.3      | 8.1        |
